# Supplementary material for: Multifunctional Vanadium Nitride-Modified Separator for High-Performance Lithium–Sulfur Batteries
Source: MDPI journal article supplement (doi:10.3390/nano14080656), 2024-04-10
Supplement: s1 [file s1]

## Supporting Information

Article

# Multifunctional Vanadium Nitride-Modified Separator for High-Performance Lithium–Sulfur Batteries

Sen Liu, Yang Liu \*, Xu Zhang, Maoqiang Shen, Xuesen Liu, Xinyue Gao, Linrui Hou and Changzhou Yuan \*

School of Materials Science & Engineering, University of Jinan, Jinan 250022, China;  
liusen@stu.ujn.edu.cn (S.L.); zhangxu@stu.ujn.edu.cn (X.Z.); shenmq@stu.ujn.edu.cn (M.S.);  
liuxs@stu.ujn.edu.cn (X.L.); gaoxinyue@stu.ujn.edu.cn (X.G.); mse\_houlr@ujn.edu.cn (L.H.)

\* Correspondence: mse\_liuy@ujn.edu.cn (Y.L.); ayuancz@163.com or mse\_yuancz@ujn.edu.cn (C.Y.)

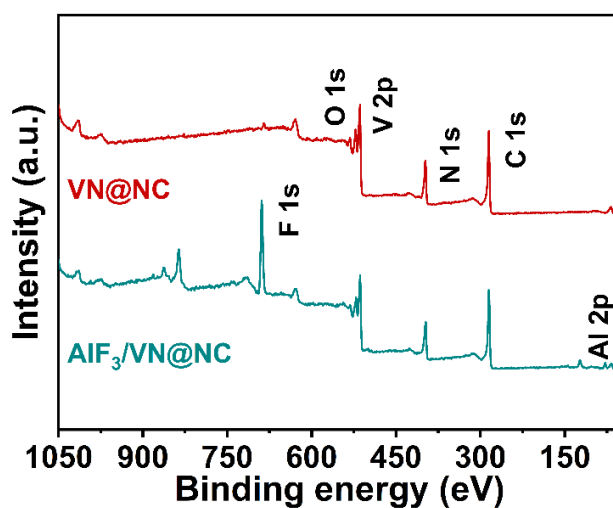

Figure S1. XPS survey spectrum of VN@NC and AlF<sub>3</sub>/VN@NC.

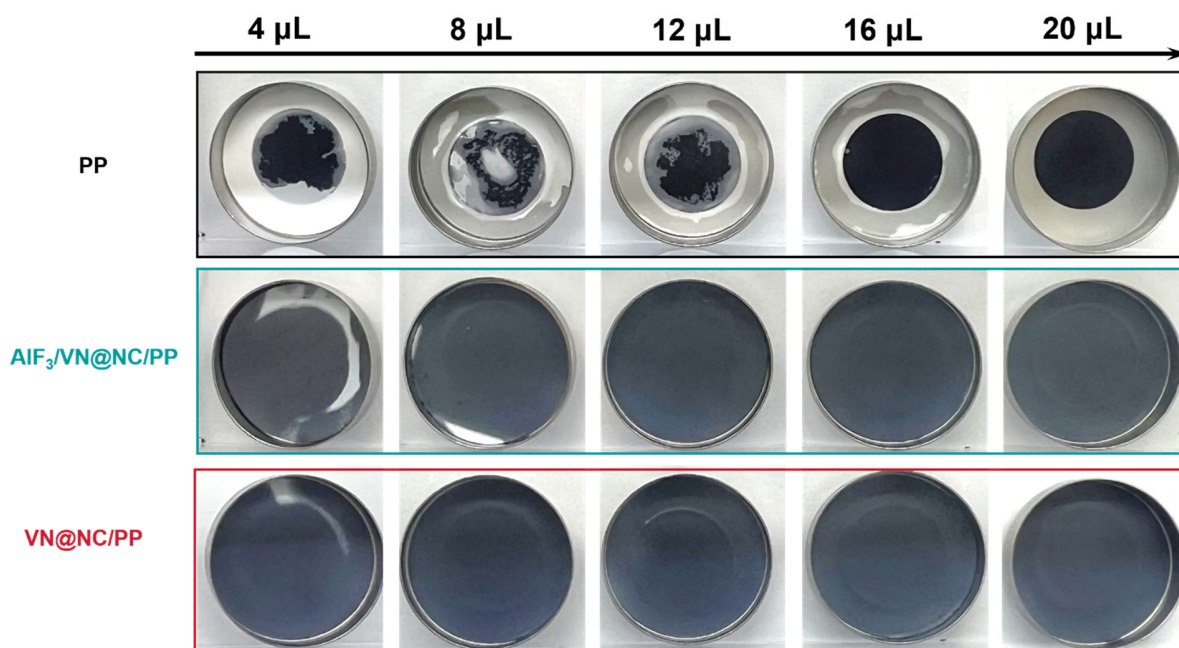

**Figure S2.** Digital photographs of the amount of electrolyte required to wet the VN@NC/PP, AlF<sub>3</sub>/VN@NC/PP, and PP separators

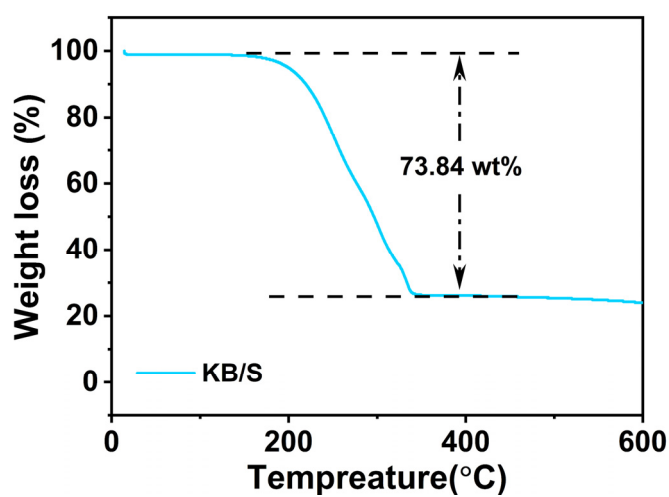

**Figure S3.** TG diagram of KB/S for checking the sulfur loading.

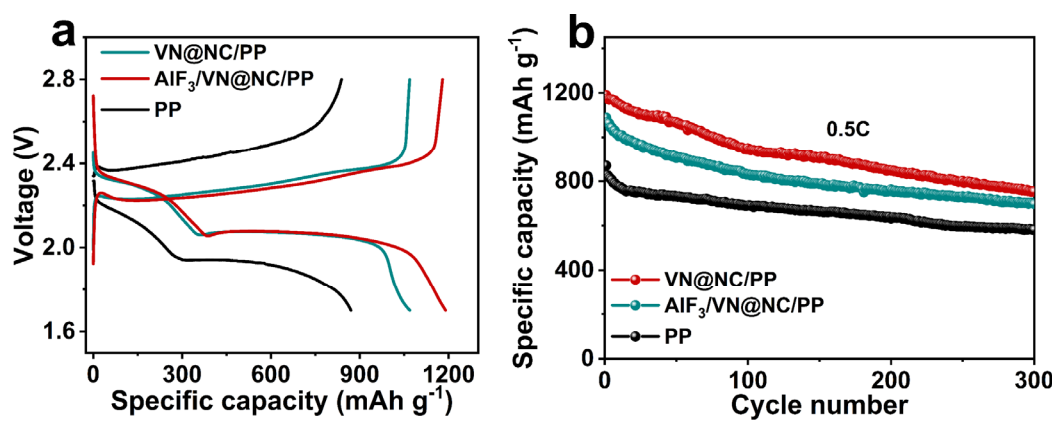

**Figure S4.** (a) Charge-discharge curves of the first cycle and (b) cycling stability for the Li-S batteries with different separators at 0.5 C.

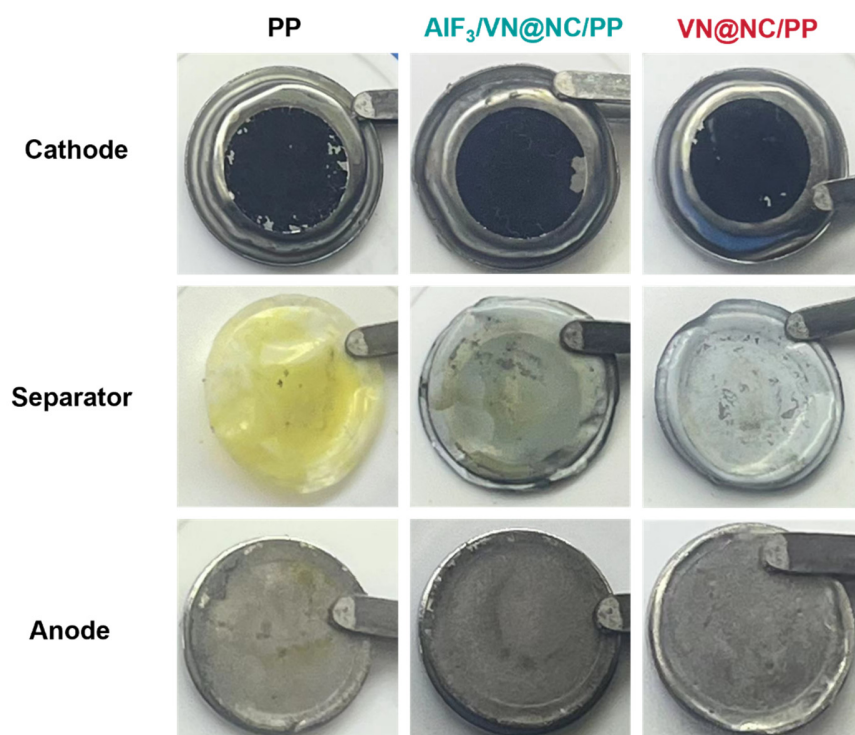

**Figure S5.** Digital images of the cathode, separators, and anode of lithium-sulfur batteries with  $\text{VN@NC/PP}$ ,  $\text{AlF}_3/\text{VN@NC/PP}$ , and PP separator after deep cycling.

**Table S1.** Comparison of key performance parameters of different diaphragm modification materials for lithium-sulfur batteries.

| separator                                                       | sulfur-loading<br>(mg cm <sup>-2</sup> ) | Initial capacity<br>(mA h g <sup>-1</sup> ) | Life<br>(Cycling number) | current density<br>(C) | decay/cycle | ref.      |
|-----------------------------------------------------------------|------------------------------------------|---------------------------------------------|--------------------------|------------------------|-------------|-----------|
| VN@NC                                                           | ~1.0                                     | 1052.4                                      | 400                      | 1                      | 0.085%      | this work |
|                                                                 | ~5.41                                    | 503.5                                       | 100                      | 1                      | 0.083%      | this work |
| NSPCF@CoS <sub>2</sub> @C-150                                   | -                                        | 846.1                                       | 100                      | 0.5                    | 0.21%       | [74]      |
|                                                                 | 3.0                                      | 668.5                                       | 100                      | 0.5                    | 0.25%       |           |
| Ta <sub>5</sub> C <sub>3</sub> -Ta <sub>2</sub> O <sub>5</sub>  | ~0.9                                     | 801.9                                       | 500                      | 1                      | 0.086%      | [75]      |
| ZIF-67/SA-PAN                                                   | 1                                        | 801.8                                       | 500                      | 1                      | 0.089%      | [76]      |
|                                                                 | 5.45                                     | -                                           | 100                      | 0.1                    | 0.098%      |           |
| TpPa-SO <sub>3</sub> H/Celgard                                  | 1                                        | 887                                         | 100                      | 0.2                    | 0.42%       | [77]      |
|                                                                 | 5.4                                      | 788                                         | 100                      | 0.2                    | 0.16%       |           |
| Co <sub>3</sub> O <sub>4</sub> @GC/N-CNT<br>NF-coated separator | 2.0                                      | 1187                                        | 250                      | 0.1                    | 0.16%       | [78]      |
| Al-CPP/Celgard                                                  | ~1                                       | 935.7                                       | 500                      | 1                      | 0.12%       | [79]      |
| N-C@TiO <sub>2</sub> /HNC-<br>coated separator                  | 1.64                                     | 1373                                        | 500                      | 0.1                    | 0.11%       | [80]      |
| CNT CoN-V <sub>N</sub>                                          | 2.5                                      | 851.6                                       | 250                      | 2                      | 0.09 %      | [81]      |
